# Supplementary material for: Effect of rGO with BaCuO3 perovskite on the thermal decomposition of AP and NTO
Source: Royal Society of Chemistry journal article supplement (doi:10.1039/d2ra00953f), 2022-01-01
Supplement: d2ra00953f1.pdf [file d2ra00953f1.pdf]

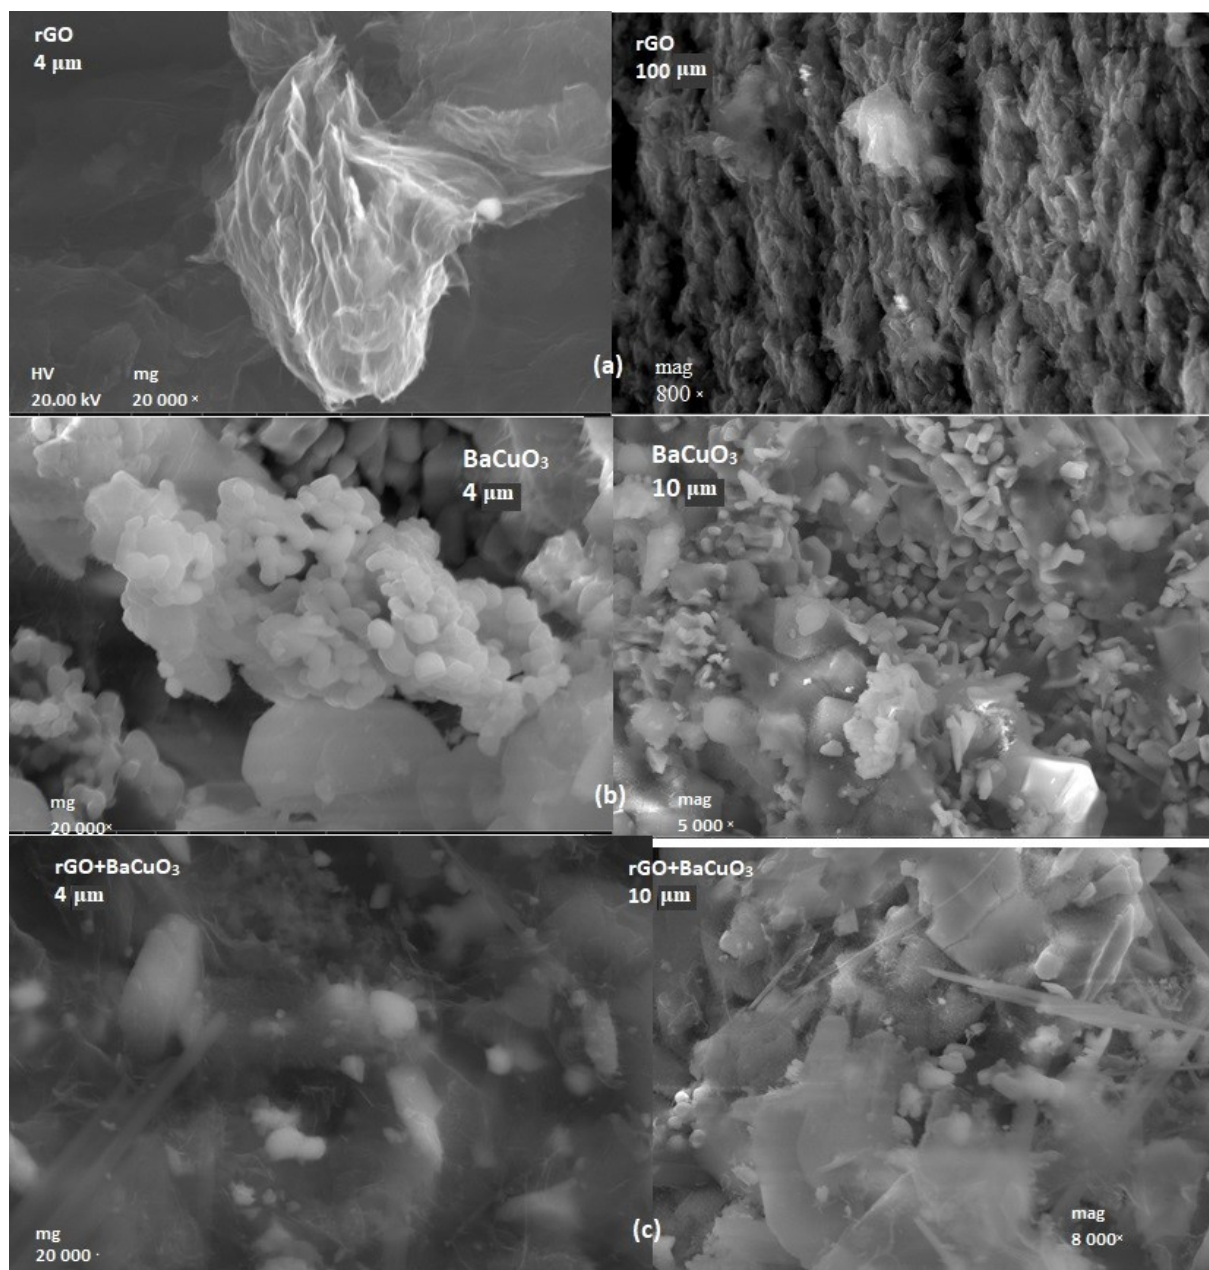

**Fig 1S.** FEG-SEM micrographs of (a) rGO, (b) BaCuO<sub>3</sub>, and (c) rGO+BaCuO<sub>3</sub> with various magnification.
